# Supplementary material for: Impact of Single and Combined Salinity and High-Temperature Stresses on Agro-Physiological, Biochemical, and Transcriptional Responses in Rice and Stress-Release
Source: MDPI journal article supplement (doi:10.3390/plants11040501), 2022-02-12
Supplement: s1 [file s1]

**Impact of single and combined salinity and high-temperature stresses on agro-physiological, biochemical, and transcriptional responses in rice and stress-release**

Lutfun NAHAR<sup>1,2</sup>, Murat AYCAN<sup>3</sup>, Shigeru HANAMATA<sup>3</sup>, Marouane BASLAM<sup>3\*</sup>,  
Toshiaki MITSUI<sup>1,3\*</sup>

<sup>1</sup>Department of Life and Food Sciences, Graduate School of Science and Technology, Niigata University, Niigata, Japan.

<sup>2</sup>Department of Agricultural Botany, Sher-e-Bangla Agricultural University, Dhaka-1207, Bangladesh.

<sup>3</sup>Laboratory of Biochemistry, Faculty of Agriculture, Niigata University, Niigata, Japan.

**Running Title:** Specific responses/mechanisms to single and combined stresses in rice

**\*Author for correspondence:**

Toshiaki MITSUI, Ph.D., Prof.; Marouane BASLAM, Ph.D., Assist. Prof.

Laboratory of Biochemistry, Faculty of Agriculture, Niigata University, 8050 Ikarashi 2-no-cho, Nishi-ku, Niigata City, Niigata 950-2181, Japan.

Tel: +81-25-262-6641

Email: t.mitsui@agr.niigata-u.ac.jp; mbaslam@gs.niigata-u.ac.jp

## Supporting Information

**Table S1.** Primer list

| Accession number | Gene name       | Forward primer          | Reverse primer          |
|------------------|-----------------|-------------------------|-------------------------|
| Os12g0641100     | <i>OsSOS1</i>   | TTGCATCTACTTGGAATGGACAG | TACAGTAACCCAATCAGCAGGA  |
| Os06g0606000     | <i>OsSOS2</i>   | ACGTTCGCCAAGGTCAAGTT    | ATTGGGGTGTCTTACAATCTTCA |
| Os05g0534400     | <i>OsSOS3</i>   | CTCAGGGAGATGGTCTTGGC    | CATGTTCCCTTAGTGATGCCGG  |
| Os01g0307500     | <i>OsHKT1;5</i> | CTCTTCATGGCGGTCAACTC    | CCGTTTGCTGGTGTGTTGTC    |
| Os03g0687000     | <i>OsNPF2;4</i> | GGTGCTGTTCATGTCGTTTCG   | GCGGAGGTGAAGGTGAAGTA    |
| Os07g0666900     | <i>OsNHX1</i>   | GGAAGAGCTCGCACTTATTTCG  | ATATCATTGTCCCGACGGCT    |
| Os02g0658100     | <i>OsTIP2;1</i> | ACATCACCATCCTCACC GG    | TGACGATCTCCATCACGACG    |
| Os02g0629200     | <i>OsPIP2;3</i> | TGTTTCATGGTTCAC TTGGCC  | CGCGGAAGGAGGAGGAAG      |
| Os07g0448100     | <i>OsPIP2;4</i> | GTACACCGTCTTCTCCGCC     | CACTCCAGGCCTTGTTGTTG    |
| Os04g0233400     | <i>OsPIP2;5</i> | GTACACCGTCTTCTCCGCC     | CCATGCCTTGCTGTTGTTGTA   |
| Os05g0455500     | <i>OsP5CS</i>   | GACTGTTGGCACTGGA ACTG   | TGCTGTCATGCCTCCTCTAC    |
| Os05g0323900     | <i>OsMSD1</i>   | AGGTGCTGCTTTACAAGGA     | CCCAACAAAGGAACCAAGTT    |
| Os01g0184100     | <i>OsHSP18</i>  | GAGGAGAAGGAGGAGTCGTG    | TCGATGGTCTTGGGCTTCTT    |
| Os03g0267000     | <i>OsHSP20</i>  | TCAGTTCATTCTTCTGTCGCC   | ATTGGAGTAGGTTTCGCACA    |
| Os01g0328400     | <i>OsUBQ5</i>   | ACCACTTCGACCGCCACTACT   | ACGCCTAAGCCTGCTGGTT     |

## Supporting Information

**Table S2.** Loading values and percentage contribution of principal component (PC) variables for Fig. 6A.

| Variables          | PC1            |                              | PC2            |                              | PC3            |                              |
|--------------------|----------------|------------------------------|----------------|------------------------------|----------------|------------------------------|
|                    | Loading values | Contribution of variable (%) | Loading values | Contribution of variable (%) | Loading values | Contribution of variable (%) |
| SL                 | 0.038          | 1.043                        | 0.531          | 17.785                       | 0.202          | 6.596                        |
| RL                 | -0.261         | 7.238                        | -0.095         | 3.173                        | 0.399          | 13.013                       |
| SFW                | -0.038         | 1.052                        | 0.515          | 17.235                       | 0.060          | 1.972                        |
| RFW                | -0.194         | 5.379                        | 0.256          | 8.555                        | 0.114          | 3.722                        |
| SDM                | -0.275         | 7.611                        | 0.253          | 8.453                        | -0.283         | 9.233                        |
| RDM                | -0.234         | 6.475                        | 0.227          | 7.591                        | -0.126         | 4.099                        |
| Chla               | -0.353         | 9.768                        | 0.037          | 1.246                        | -0.038         | 1.252                        |
| Chlb               | -0.317         | 8.766                        | -0.029         | 0.971                        | -0.039         | 1.261                        |
| ChlT               | -0.323         | 8.944                        | 0.080          | 2.666                        | -0.033         | 1.092                        |
| MDA                | -0.256         | 7.089                        | -0.239         | 8.002                        | 0.387          | 12.642                       |
| APX                | -0.304         | 8.422                        | -0.133         | 4.456                        | 0.061          | 1.976                        |
| CAT                | -0.303         | 8.389                        | -0.075         | 2.495                        | -0.261         | 8.527                        |
| SOD                | -0.186         | 5.155                        | -0.013         | 0.435                        | 0.592          | 19.328                       |
| PRO                | -0.324         | 8.970                        | 0.103          | 3.431                        | -0.251         | 8.195                        |
| PTN                | 0.206          | 5.699                        | 0.404          | 13.506                       | 0.217          | 7.091                        |
| Standart deviation |                | 2.744                        |                | 1.682                        |                | 1.292                        |
| Variability (%)    |                | 50.218                       |                | 18.866                       |                | 11.130                       |
| Cumulative (%)     |                | 50.218                       |                | 69.084                       |                | 80.215                       |

## Supporting Information

**Table S3.** Loading values and percentage contribution of principal component (PC) variables for Fig. 6B.

| Variables          | PC1            |                              | PC2            |                              | PC3            |                              |
|--------------------|----------------|------------------------------|----------------|------------------------------|----------------|------------------------------|
|                    | Loading values | Contribution of variable (%) | Loading values | Contribution of variable (%) | Loading values | Contribution of variable (%) |
| SL                 | 0.322          | 9.295                        | 0.266          | 8.190                        | 0.012          | 0.434                        |
| RL                 | 0.214          | 6.179                        | -0.420         | 12.921                       | -0.247         | 9.167                        |
| SFW                | 0.309          | 8.939                        | 0.243          | 7.488                        | 0.057          | 2.112                        |
| RFW                | 0.302          | 8.738                        | 0.182          | 5.602                        | -0.011         | 0.404                        |
| SDM                | 0.337          | 9.733                        | 0.150          | 4.618                        | 0.114          | 4.235                        |
| RDM                | 0.323          | 9.340                        | 0.130          | 3.998                        | 0.153          | 5.691                        |
| Chla               | 0.344          | 9.936                        | -0.088         | 2.719                        | -0.058         | 2.171                        |
| Chlb               | 0.320          | 9.236                        | -0.174         | 5.349                        | -0.065         | 2.416                        |
| ChlT               | 0.342          | 9.883                        | -0.113         | 3.467                        | 0.094          | 3.480                        |
| MDA                | 0.119          | 3.431                        | -0.137         | 4.210                        | -0.518         | 19.214                       |
| APX                | 0.195          | 5.646                        | -0.439         | 13.490                       | 0.264          | 9.804                        |
| CAT                | -0.020         | 0.572                        | -0.109         | 3.347                        | 0.573          | 21.258                       |
| SOD                | -0.030         | 0.854                        | -0.078         | 2.407                        | 0.462          | 17.155                       |
| PRO                | 0.059          | 1.691                        | -0.562         | 17.278                       | 0.019          | 0.706                        |
| PTN                | 0.226          | 6.527                        | 0.160          | 4.917                        | -0.047         | 1.754                        |
| Standart deviation |                | 2.707                        |                | 1.537                        |                | 1.380                        |
| Variability (%)    |                | 48.859                       |                | 15.753                       |                | 12.705                       |
| Cumulative (%)     |                | 48.859                       |                | 64.613                       |                | 77.319                       |

## Supporting Information

**Table S4.** Loading values and percentage contribution of principal component (PC) variables for Fig. 6C.

| Variables          | PC1            |                              | PC2            |                              | PC3            |                              |
|--------------------|----------------|------------------------------|----------------|------------------------------|----------------|------------------------------|
|                    | Loading values | Contribution of variable (%) | Loading values | Contribution of variable (%) | Loading values | Contribution of variable (%) |
| SL                 | 0.298          | 8.002                        | 0.233          | 6.989                        | 0.095          | 2.722                        |
| RL                 | 0.227          | 6.115                        | -0.067         | 2.015                        | -0.293         | 8.373                        |
| SFW                | 0.302          | 8.127                        | 0.184          | 5.523                        | -0.249         | 7.106                        |
| RFW                | 0.280          | 7.525                        | 0.142          | 4.250                        | -0.390         | 11.158                       |
| SDM                | 0.306          | 8.222                        | 0.161          | 4.820                        | -0.257         | 7.342                        |
| RDM                | 0.291          | 7.809                        | 0.133          | 3.969                        | -0.349         | 9.969                        |
| Chla               | 0.304          | 8.176                        | -0.183         | 5.479                        | 0.222          | 6.346                        |
| Chlb               | 0.279          | 7.510                        | 0.179          | 5.369                        | 0.327          | 9.336                        |
| ChlT               | 0.303          | 8.149                        | 0.035          | 1.060                        | 0.338          | 9.676                        |
| MDA                | 0.265          | 7.133                        | -0.225         | 6.743                        | 0.252          | 7.193                        |
| APX                | 0.263          | 7.076                        | -0.269         | 8.056                        | 0.030          | 0.865                        |
| CAT                | 0.108          | 2.906                        | -0.461         | 13.817                       | -0.183         | 5.241                        |
| SOD                | 0.077          | 2.058                        | -0.489         | 14.631                       | -0.127         | 3.639                        |
| PRO                | 0.156          | 4.184                        | -0.421         | 12.599                       | 0.044          | 1.258                        |
| PTN                | 0.261          | 7.009                        | 0.156          | 4.680                        | 0.342          | 9.778                        |
| Standart deviation |                | 2.956                        |                | 1.706                        |                | 1.137                        |
| Variability (%)    |                | 58.253                       |                | 19.415                       |                | 8.62                         |
| Cumulative (%)     |                | 58.253                       |                | 77.669                       |                | 86.289                       |

## Supporting Information

**Table S5.** Loading values and percentage contribution of principal component (PC) variables for Fig. 6D.

| Variables          | PC1            |                              | PC2            |                              | PC3            |                              |
|--------------------|----------------|------------------------------|----------------|------------------------------|----------------|------------------------------|
|                    | Loading values | Contribution of variable (%) | Loading values | Contribution of variable (%) | Loading values | Contribution of variable (%) |
| SL                 | 0.287          | 7.781                        | 0.113          | 3.693                        | 0.263          | 7.512                        |
| RL                 | 0.244          | 6.627                        | -0.225         | 7.372                        | -0.13          | 3.715                        |
| SFW                | 0.292          | 7.925                        | -0.038         | 1.252                        | 0.359          | 10.259                       |
| RFW                | 0.297          | 8.071                        | -0.135         | 4.434                        | 0.308          | 8.807                        |
| SDM                | 0.307          | 8.338                        | -0.068         | 2.231                        | 0.297          | 8.500                        |
| RDM                | 0.301          | 8.185                        | -0.117         | 3.822                        | 0.273          | 7.818                        |
| Chla               | 0.288          | 7.810                        | 0.178          | 5.842                        | -0.243         | 6.940                        |
| Chlb               | 0.29           | 7.873                        | 0.073          | 2.399                        | -0.08          | 2.303                        |
| ChlT               | 0.311          | 8.449                        | 0.071          | 2.335                        | -0.117         | 3.356                        |
| MDA                | 0.246          | 6.689                        | -0.014         | 0.453                        | -0.514         | 14.696                       |
| APX                | 0.247          | 6.704                        | 0.271          | 8.873                        | -0.147         | 4.199                        |
| CAT                | 0.095          | 2.583                        | -0.41          | 13.434                       | -0.241         | 6.906                        |
| SOD                | -0.024         | 0.647                        | -0.534         | 17.520                       | -0.095         | 2.707                        |
| PRO                | 0.195          | 5.304                        | -0.461         | 15.126                       | -0.169         | 4.845                        |
| PTN                | 0.258          | 7.013                        | 0.342          | 11.214                       | -0.26          | 7.435                        |
| Standart deviation |                | 2.999                        |                | 1.348                        |                | 1.128                        |
| Variability (%)    |                | 59.995                       |                | 12.119                       |                | 8.497                        |
| Cumulative (%)     |                | 59.995                       |                | 72.115                       |                | 0.806                        |
